# Supplementary material for: The Non-Gastric H+/K+ ATPase (ATP12A) Is Expressed in Mammalian Spermatozoa
Source: Int J Mol Sci. 2022 Jan 19;23(3):1048. doi: 10.3390/ijms23031048 (PMC8835340; doi:10.3390/ijms23031048)
Supplement: Supplementary file 1 [file ijms-23-01048-s001.zip]

Archive with 4 entries (4 files):
- ijms-1474262-supplementary.pdf
- Supplementary Table S1.xlsx
- Supplementary Table S2.xlsx
- Supplementary Table S3.xlsx
