# Supplementary material for: The Non-Gastric H+/K+ ATPase (ATP12A) Is Expressed in Mammalian Spermatozoa
Source: Int J Mol Sci. 2022 Jan 19;23(3):1048. doi: 10.3390/ijms23031048 (PMC8835340; doi:10.3390/ijms23031048)
Supplement: Supplementary file 1 [file ijms-23-01048-s001.zip › Supplementary Table S1.xlsx]

## Sheet: MatGAT.43seq.ATP12A.ATP1A1.4.AT
	1. Homo.sapiens.ATP12A.NP_001667/1-1039	2. Bos.taurus.ATP12A.XP_002691916/1-1037	3. Bos.indicus.XP_019827373/1-1058	4. Bubalus.bubalis.XP_006046156/1-1038	5. Bison.bison.bison.XP_010830622/1-1107	6. Bos.mutus.XP_005888792/1-1106	7. Ovis.aries.XP_004012362/1-1059	8. Capra.hircus.XP_017912007/1-1038	9. Camelus.dromedarius.XP_031321519/1-1038	10. Camelus.bactrianus.XP_010949903.1/1-972	11. Camelus.ferus.XP_006176623.1/1-972	12. Homo.sapiens.ATP4A.NP_000695/1-1035	13. Bos.mutus.XP_005908254/1-1034	14. Bos.taurus.NP_001137561/1-1034	15. Bubalus.bubalis.XP_006068866/1-1034	16. Camelus.dromedarius.KAB1274459.1/1-1044	17. Camelus.ferus.XP_032343944.1/1-1080	18. Camelus.bactrianus.XP_010948397.1/1-1013	19. Camelus.ferus.EPY81295.1/1-1212	20. Vicugna.pacos.XP_015105681.2/1-1102	21. Homo.sapiens.ATP1A1.NP_000692/1-1023	22. Camelus.dromedarius.XP_010979001/1-1021	23. Bos.taurus.NP_001070266/1-1021	24. Ovis.aries.XP_027824133/1-992	25. Bison.bison.bison.XP_010829032/1-992	26. Sus.scrofa.NP_999414/1-1021	27. Homo.sapiens.ATP1A2.NP_000693/1-1020	28. Ovis.aries.XP_004002710/1-1020	29. Camelus.ferus.XP_006173993/1-982	30. Bos.taurus.ATP1A2.NP_001074993.1/1-1020	31. Cavia.porcellus.XP_003466610/1-1020	32. Homo.sapiens.ATP1A3.NP_689509/1-1013	33. Camelus.bactrianus.XP_010945046/1-1014	34. Bos.taurus.ATP1A3.XP_024834878.1/1-1027	35. Camelus.dromedarius.XP_010979754/1-1027	36. Bos.indicus.XP_019833818/1-1101	37. Homo.sapiens.ATP1A4.NP_653300/1-1029	38. Camelus.bactrianus.XP_010953937/1-1030	39. Camelus.ferus.XP_006173996/1-1030	40. Camelus.dromedarius.XP_010991407/1-1093	41. Vicugna.pacos.XP_006215708/1-1030	42. Bos.taurus.NP_001137575/1-1030
1. Homo.sapiens.ATP12A.NP_001667/1-1039		87.2	85.8	87.7	82.1	82.1	86.3	87.7	88.6	84.6	84.7	63.9	63.4	63.4	63.4	62.8	61.0	63.0	54.2	60.3	63.7	64.0	63.7	62.9	62.7	63.7	63.7	63.5	62.6	63.7	63.9	63.2	63.3	63.4	63.6	56.3	61.1	61.0	60.9	58.3	61.5	62.7
2. Bos.taurus.ATP12A.XP_002691916/1-1037	94.7		97.7	99.1	93.5	93.5	95.3	97.6	88.4	84.6	84.6	64.4	64.0	64.0	64.2	63.7	61.7	64.0	54.5	60.3	64.6	64.5	64.2	63.5	63.1	64.1	64.3	64.1	62.5	64.3	64.4	64.2	64.2	64.4	64.6	57.0	61.6	62.0	61.9	59.1	62.3	62.8
3. Bos.indicus.XP_019827373/1-1058	93.1	97.8		96.9	95.2	95.2	97.1	95.4	86.8	82.9	82.9	63.1	62.8	62.8	63.0	62.5	62.1	62.7	55.1	61.0	63.3	63.1	62.9	62.1	61.7	62.9	62.9	62.7	61.2	62.9	62.9	63.0	63.0	63.2	63.3	57.1	60.4	61.0	60.9	59.8	61.3	61.7
4. Bubalus.bubalis.XP_006046156/1-1038	94.9	99.6	97.5		92.9	92.9	95.6	97.9	88.7	84.8	84.8	64.8	64.3	64.3	64.5	63.9	61.9	64.3	54.5	60.5	64.6	64.4	64.1	63.4	63.0	64.0	64.2	64.0	62.5	64.2	64.3	64.4	64.2	64.4	64.6	56.8	61.8	62.1	62.0	59.3	62.6	63.0
5. Bison.bison.bison.XP_010830622/1-1107	89.0	93.7	95.3	93.4		99.3	92.8	91.4	83.0	79.3	79.3	60.8	60.7	60.7	60.9	60.2	61.9	60.0	56.2	61.7	61.2	60.8	60.5	59.3	59.0	60.4	60.5	60.3	58.5	60.5	60.4	60.3	60.3	60.4	60.9	58.4	58.1	58.5	58.4	59.4	58.8	59.3
6. Bos.mutus.XP_005888792/1-1106	89.0	93.7	95.3	93.4	99.5		92.7	91.4	83.0	79.3	79.3	60.8	60.7	60.7	60.8	60.2	61.6	60.0	56.1	61.2	60.9	60.8	60.5	59.3	59.0	60.4	60.3	60.1	58.5	60.3	60.2	60.2	60.2	60.4	60.8	57.9	58.1	58.4	58.4	59.3	58.8	59.3
7. Ovis.aries.XP_004012362/1-1059	93.1	96.7	98.4	96.9	94.0	93.9		97.6	87.0	83.2	83.2	63.4	63.1	63.1	63.3	62.4	61.9	62.7	55.3	60.4	63.6	63.0	62.7	61.9	61.7	62.6	62.7	62.5	61.2	62.7	63.0	63.1	62.9	62.9	63.3	56.8	60.2	60.4	60.3	59.6	60.8	61.3
8. Capra.hircus.XP_017912007/1-1038	94.8	98.7	96.7	98.9	92.6	92.6	97.9		88.7	84.9	84.9	64.3	64.0	64.0	64.2	63.3	61.5	63.8	54.4	60.0	64.4	64.3	64.0	63.3	63.0	63.9	64.0	63.8	62.3	64.0	64.1	64.2	64.0	64.1	64.3	56.9	61.4	61.4	61.3	58.7	61.9	62.6
9. Camelus.dromedarius.XP_031321519/1-1038	94.5	95.2	93.3	95.3	89.2	89.2	93.2	95.2		93.4	93.5	63.6	63.7	63.7	63.9	62.9	61.0	63.2	54.3	59.5	64.6	64.5	64.4	63.8	63.5	64.2	63.9	63.6	62.5	63.9	64.0	64.4	64.5	64.7	65.0	56.8	61.8	61.5	61.4	58.4	61.5	63.4
10. Camelus.bactrianus.XP_010949903.1/1-972	89.5	90.5	88.7	90.5	84.7	84.7	88.6	90.4	93.5		99.9	61.8	62.0	62.0	62.2	61.2	59.3	63.1	52.4	57.9	63.3	63.6	63.5	65.4	65.1	63.3	63.0	62.7	65.1	63.0	63.1	64.1	64.0	64.2	63.3	55.0	60.0	59.6	59.5	56.2	59.8	61.7
11. Camelus.ferus.XP_006176623.1/1-972	89.6	90.5	88.7	90.5	84.7	84.7	88.6	90.4	93.6	99.9		61.9	62.1	62.1	62.3	61.3	59.4	63.2	52.5	58.0	63.4	63.7	63.6	65.5	65.2	63.4	63.1	62.8	65.2	63.1	63.2	64.2	64.1	64.3	63.4	55.1	60.1	59.7	59.6	56.3	59.9	61.8
12. Homo.sapiens.ATP4A.NP_000695/1-1035	79.3	79.9	78.3	80.3	75.1	75.1	78.4	79.8	79.3	76.1	76.2		97.7	97.6	97.4	97.0	93.5	95.9	80.2	91.7	62.3	62.6	62.7	61.8	61.6	62.3	62.7	63.2	61.5	62.9	63.1	63.8	63.8	63.9	64.0	56.4	59.4	60.0	59.9	57.1	60.1	61.0
13. Bos.mutus.XP_005908254/1-1034	78.8	79.8	78.2	79.8	75.0	75.0	78.3	79.7	79.4	76.0	76.1	99.0		99.9	99.7	97.6	94.1	96.5	80.8	92.2	62.2	62.5	62.6	61.8	61.6	62.2	62.3	62.8	61.5	62.5	62.5	63.6	63.6	63.8	63.7	56.2	59.2	60.1	60.0	56.8	60.2	61.2
14. Bos.taurus.NP_001137561/1-1034	78.8	79.8	78.2	79.8	75.0	75.0	78.3	79.7	79.4	76.0	76.1	99.0	100.0		99.6	97.5	94.0	96.4	80.7	92.1	62.3	62.5	62.7	61.9	61.7	62.3	62.3	62.8	61.5	62.5	62.5	63.6	63.6	63.8	63.7	56.2	59.1	60.0	59.9	56.7	60.1	61.3
15. Bubalus.bubalis.XP_006068866/1-1034	79.0	79.8	78.2	79.8	75.0	75.0	78.3	79.7	79.4	76.0	76.1	99.0	100.0	100.0		97.3	93.8	96.2	80.5	91.9	62.2	62.5	62.6	61.8	61.6	62.2	62.2	62.7	61.4	62.4	62.4	63.6	63.6	63.8	63.7	56.2	59.2	60.1	60.0	56.8	60.2	61.3
16. Camelus.dromedarius.KAB1274459.1/1-1044	78.6	79.7	78.5	79.8	75.3	75.4	78.4	79.3	78.7	75.5	75.6	98.4	98.5	98.5	98.5		94.6	96.9	80.9	92.7	61.7	62.0	62.1	61.2	61.0	61.7	62.0	62.5	61.1	62.2	62.3	63.0	63.1	63.2	63.3	55.8	58.8	59.4	59.3	56.4	59.5	60.5
17. Camelus.ferus.XP_032343944.1/1-1080	76.5	77.1	77.9	77.1	77.1	77.2	77.5	76.6	76.9	73.0	73.1	94.9	95.0	95.0	95.0	95.6		93.7	82.6	96.6	59.9	60.4	60.3	59.0	58.8	60.1	60.1	60.5	59.2	60.3	60.4	60.8	60.8	61.1	61.3	57.2	57.5	57.9	57.9	57.4	57.9	59.1
18. Camelus.bactrianus.XP_010948397.1/1-1013	78.4	79.7	77.9	79.7	74.5	74.6	77.5	79.2	78.6	77.8	77.9	97.2	97.3	97.3	97.3	96.9	93.8		81.4	91.7	62.4	62.8	62.9	63.0	62.8	62.5	63.1	63.6	63.0	63.3	63.4	64.6	64.5	64.6	63.9	55.6	59.3	59.7	59.6	56.5	60.0	60.6
19. Camelus.ferus.EPY81295.1/1-1212	67.8	68.4	68.7	67.9	70.5	70.4	68.9	68.1	68.0	64.7	64.8	82.8	82.9	82.9	82.9	83.0	84.7	82.3		82.7	52.9	53.2	53.3	52.6	52.4	53.0	53.3	53.8	52.5	53.5	53.6	54.2	53.7	53.8	54.4	53.7	51.2	51.7	51.7	52.4	51.9	52.1
20. Vicugna.pacos.XP_015105681.2/1-1102	75.0	75.8	76.7	75.8	77.3	77.5	76.0	75.0	75.1	71.4	71.5	93.1	93.2	93.2	93.2	93.7	97.2	91.8	85.2		58.6	59.0	59.1	57.9	57.7	58.7	59.0	59.4	57.8	59.1	59.2	59.6	59.6	59.7	59.8	57.3	56.3	57.1	57.0	56.9	56.9	58.1
21. Homo.sapiens.ATP1A1.NP_000692/1-1023	80.1	81.2	79.9	81.6	76.7	76.6	79.4	80.6	81.3	79.0	79.1	79.9	79.8	79.8	80.0	79.0	76.5	80.1	67.7	75.0		98.2	97.5	94.9	94.5	98.1	86.9	87.2	85.3	86.9	86.9	86.3	86.4	86.5	86.5	74.8	78.0	79.1	79.0	74.6	79.3	79.7
22. Camelus.dromedarius.XP_010979001/1-1021	79.8	81.1	79.5	80.6	76.2	76.2	78.7	80.2	80.7	79.0	79.1	79.5	79.5	79.5	79.7	78.8	76.3	79.8	67.6	74.8	99.5		98.3	95.4	95.1	98.6	87.2	87.5	85.4	87.2	87.2	86.7	86.6	86.7	86.3	74.7	78.0	78.9	78.8	74.5	79.2	79.6
23. Bos.taurus.NP_001070266/1-1021	79.7	81.3	79.7	80.8	76.4	76.4	78.8	80.3	80.9	79.2	79.3	79.6	79.6	79.6	79.8	78.9	76.4	79.9	67.7	74.9	98.9	99.3		96.9	96.8	97.9	86.8	87.1	85.0	86.8	86.8	86.4	86.3	86.4	86.0	74.5	77.4	78.1	78.0	73.7	78.4	79.2
24. Ovis.aries.XP_027824133/1-992	78.5	79.9	78.3	80.0	74.9	74.9	77.9	79.6	79.6	81.5	81.6	78.1	77.9	77.9	78.1	77.3	74.6	79.6	66.3	73.1	96.2	96.6	97.1		99.3	94.9	85.4	85.7	87.4	85.4	85.4	86.2	86.1	86.2	85.0	73.2	76.2	77.3	77.2	72.9	77.6	78.2
25. Bison.bison.bison.XP_010829032/1-992	78.2	79.6	77.9	79.6	74.5	74.5	77.5	79.2	79.3	81.1	81.3	77.9	77.8	77.8	77.9	77.1	74.4	79.4	66.1	73.0	95.8	96.1	96.8	99.5		94.7	85.1	85.4	87.1	85.1	85.1	85.9	85.8	85.9	84.7	72.9	75.9	77.0	76.9	72.6	77.3	77.9
26. Sus.scrofa.NP_999414/1-1021	79.5	80.8	79.2	80.3	76.0	75.9	78.4	79.9	80.4	78.7	78.8	79.5	79.5	79.5	79.7	78.8	76.3	79.8	67.6	74.8	99.1	99.4	99.0	96.0	95.8		86.7	87.0	84.9	86.7	86.7	86.3	86.2	86.3	85.9	74.4	77.6	78.4	78.3	74.0	78.7	79.3
27. Homo.sapiens.ATP1A2.NP_000693/1-1020	79.2	80.3	78.6	80.5	75.6	75.4	78.3	80.0	80.1	78.2	78.3	79.7	79.5	79.5	79.7	78.9	76.2	80.3	67.5	75.0	94.4	94.5	94.4	92.4	92.0	94.2		99.0	95.3	99.3	99.1	87.0	87.0	86.6	86.8	75.2	79.0	79.5	79.2	75.1	79.6	80.3
28. Ovis.aries.XP_004002710/1-1020	79.2	80.4	78.7	80.6	75.7	75.5	78.4	80.1	80.0	78.1	78.2	79.8	79.6	79.6	79.8	79.0	76.3	80.4	67.6	75.0	94.5	94.6	94.5	92.5	92.1	94.3	99.9		96.1	99.3	98.7	87.0	87.0	86.6	86.8	75.2	78.9	79.8	79.5	75.4	79.9	80.4
29. Camelus.ferus.XP_006173993/1-982	77.2	78.6	76.8	78.6	73.5	73.5	76.7	78.2	77.8	81.3	81.4	77.5	77.4	77.4	77.6	76.7	74.2	79.1	65.8	72.6	91.5	91.6	91.5	94.2	93.8	91.3	96.2	96.3		95.6	95.1	86.5	86.4	86.2	85.5	73.4	77.2	78.3	78.0	73.6	78.4	78.8
30. Bos.taurus.ATP1A2.NP_001074993.1/1-1020	79.2	80.4	78.7	80.6	75.7	75.5	78.4	80.1	80.1	78.2	78.3	79.8	79.6	79.6	79.8	79.0	76.3	80.4	67.6	75.0	94.5	94.6	94.5	92.5	92.1	94.3	99.9	100.0	96.3		99.1	87.0	87.0	86.6	86.8	75.2	79.0	79.6	79.3	75.2	79.7	80.3
31. Cavia.porcellus.XP_003466610/1-1020	79.3	80.4	78.6	80.6	75.3	75.3	78.4	80.1	80.1	78.2	78.3	79.9	79.4	79.4	79.6	78.9	76.2	80.3	67.5	75.0	94.3	94.4	94.3	92.3	91.9	94.1	99.8	99.7	96.1	99.7		86.9	86.9	86.7	86.7	75.3	78.9	79.4	79.1	75.0	79.5	80.5
32. Homo.sapiens.ATP1A3.NP_689509/1-1013	79.6	81.1	79.4	81.1	76.1	75.9	79.0	80.5	80.2	79.3	79.4	79.2	79.2	79.2	79.4	78.4	75.8	80.4	67.3	74.1	93.7	93.5	93.3	93.0	92.7	93.3	93.8	93.9	92.6	93.9	93.7		99.7	99.4	98.3	84.5	77.1	77.7	77.6	73.3	77.9	78.3
33. Camelus.bactrianus.XP_010945046/1-1014	79.6	81.1	79.4	81.1	76.1	75.9	79.0	80.5	80.3	79.2	79.3	79.2	79.3	79.3	79.5	78.4	75.7	80.3	66.8	74.0	93.8	93.3	93.1	92.9	92.6	93.1	93.9	94.0	92.5	94.0	93.8	99.8		99.7	98.6	84.7	77.1	77.6	77.5	73.2	78.0	78.2
34. Bos.taurus.ATP1A3.XP_024834878.1/1-1027	79.7	81.2	79.5	81.2	76.2	76.0	79.1	80.5	80.3	79.2	79.3	79.1	79.2	79.2	79.4	78.4	75.8	80.2	66.7	74.0	93.8	93.3	93.1	92.9	92.6	93.1	93.7	93.8	92.5	93.8	93.6	99.8	100.0		98.3	85.0	77.1	77.6	77.5	73.2	78.0	78.2
35. Camelus.dromedarius.XP_010979754/1-1027	80.0	81.5	79.9	81.5	76.7	76.7	79.5	81.0	81.1	78.3	78.4	79.4	79.6	79.6	79.8	78.7	76.2	79.4	67.7	74.3	93.8	93.4	93.3	91.8	91.5	93.2	93.6	93.7	91.5	93.7	93.5	98.4	98.6	98.6		85.1	77.2	77.9	77.8	73.4	78.3	78.3
36. Bos.indicus.XP_019833818/1-1101	73.8	74.0	74.6	74.7	76.5	76.3	74.6	73.9	73.6	70.2	70.3	72.7	72.0	72.0	72.2	72.7	74.3	71.5	68.3	74.6	83.9	83.6	83.4	81.7	81.4	83.4	83.9	84.0	81.6	84.0	83.8	87.9	88.1	88.1	88.6		67.3	68.3	68.2	69.1	68.8	68.5
37. Homo.sapiens.ATP1A4.NP_653300/1-1029	76.9	77.6	76.3	77.6	73.2	73.1	76.2	77.2	77.3	74.6	74.7	76.2	76.1	76.1	76.2	75.9	73.7	76.4	65.7	72.2	87.8	87.6	87.3	85.7	85.4	87.4	89.1	89.2	86.7	89.2	89.0	87.4	87.3	87.4	87.4	78.9		85.8	85.7	80.9	86.1	86.6
38. Camelus.bactrianus.XP_010953937/1-1030	76.9	78.0	76.5	77.7	73.4	73.4	76.2	77.6	77.5	74.9	75.0	76.1	76.2	76.2	76.4	75.6	74.0	76.0	65.3	72.9	88.3	88.1	87.7	86.0	85.7	87.9	90.1	90.2	87.6	90.2	90.0	88.3	88.1	88.0	88.7	79.7	94.4		99.7	94.0	99.0	89.8
39. Camelus.ferus.XP_006173996/1-1030	76.9	78.0	76.5	77.7	73.4	73.4	76.2	77.6	77.5	74.9	75.0	76.1	76.2	76.2	76.4	75.6	74.0	76.0	65.3	72.9	88.3	88.1	87.7	86.0	85.7	87.9	90.0	90.1	87.5	90.1	89.9	88.3	88.1	88.0	88.7	79.7	94.5	99.9		94.1	98.9	89.7
40. Camelus.dromedarius.XP_010991407/1-1093	73.7	74.1	74.9	74.1	74.9	74.7	74.9	73.9	74.2	70.5	70.6	72.5	72.1	72.1	72.3	72.3	73.6	71.9	66.7	73.4	83.4	83.1	82.7	81.1	80.8	82.9	84.8	84.9	82.4	84.9	84.7	83.3	83.0	82.9	83.6	81.4	89.0	94.1	94.1		93.2	84.5
41. Vicugna.pacos.XP_006215708/1-1030	77.1	77.9	76.4	77.5	73.4	73.4	75.8	77.3	77.6	75.0	75.1	76.0	76.1	76.1	76.3	75.4	73.7	75.9	65.2	72.2	88.4	88.3	87.9	86.0	85.7	88.1	89.9	90.0	87.4	90.0	89.8	88.2	88.1	88.0	88.6	79.8	94.7	99.4	99.5	93.7		90.2
42. Bos.taurus.NP_001137575/1-1030	77.6	78.2	76.7	78.3	73.7	73.7	76.5	77.9	77.8	75.5	75.6	77.3	77.2	77.2	77.3	76.6	74.5	77.0	65.9	73.4	88.6	88.4	88.2	86.7	86.4	88.3	90.2	90.1	87.8	90.1	90.2	88.3	88.3	88.3	88.7	79.8	94.8	95.5	95.6	90.0	95.8
