# Supplementary material for: The Non-Gastric H+/K+ ATPase (ATP12A) Is Expressed in Mammalian Spermatozoa
Source: Int J Mol Sci. 2022 Jan 19;23(3):1048. doi: 10.3390/ijms23031048 (PMC8835340; doi:10.3390/ijms23031048)
Supplement: Supplementary file 1 [file ijms-23-01048-s001.zip › Supplementary Table S2.xlsx]

## Sheet: MatGAT.50seq.ATP1A1.4B.ATP4B.P2
	1. H.sapiens.ATP1B1.NP_001668.1/1-303	2. B.taurus.4XE5_B/1-303	3. B.bubalis.XP_006054394.1/1-303	4. B.mutus.XP_005902436.1/1-303	5. O.aries.NP_001009796.1/1-303	6. C.hircus.XP_005690673.1/1-303	7. C.ferus.XP_006173308.1/1-303	8. C.bactrianus.XP_010952134.1/1-303	9. V.pacos.XP_006211156.1/1-303	10. H.sapiens.ATP4B.NP_000696.1/1-291	11. B.taurus.NP_001193069.1/1-290	12. B.bubalis.XP_006076675.1/1-290	13. B.indicus.XP_019827352.1/1-290	14. B.mutus.XP_005910586.1/1-290	15. B.bison.XP_010829740.1/1-290	16. C.hircus.XP_017900480.1/1-290	17. C.ferus.XP_006176796.1/1-291	18. C.bactrianus.XP_010950625.1/1-291	19. C.dromedarius.XP_031321504.1/1-289	20. O.aries.ATP1B2.XP_004012719.1/1-290	21. H.sapiens.ATP1B2.NP_001669.3/1-290	22. B.taurus.NP_777102.1/1-290	23. B.bubalis.NP_001277856.1/1-290	24. B.mutus.XP_005894863.1/1-290	25. B.indicus.XP_019837998.1/1-290	26. B.bison.XP_010841514.1/1-310	27. O.aries.XP_004012719.1/1-290	28. C.ferus.XP_014407115.1/1-237	29. C.bactrianus.XP_010964225.1/1-290	30. V.pacos.XP_006218838.1/1-290	31. H.sapiens.ATP1B3.NP_001670.1/1-279	32. B.taurus.NP_001030470.1/1-279	33. B.indicus.XP_019817093.1/1-279	34. B.mutus.ELR61450.1/1-243	35. B.bubalis.XP_006078090.1/1-279	36. B.bison.XP_010856473.1/1-222	37. C.dromedarius.XP_031302045.1/1-279	38. C.bactrianus.XP_010950563.1/1-222	39. V.pacos.XP_006202823.2/1-269	40. O.aries.XP_011957641.1/1-279	41. H.sapiens.ATP1B4.NP_036201.1/1-353	42. H.sapiens.NP_001135919.1/1-357	43. B.taurus.XP_005227518.1/1-351	44. B.bubalis.XP_006048859.1/1-351	45. C.ferus.XP_006194169.1/1-350	46. O.aries.XP_011962738.1/1-352	47. C.hircus.XP_017899763.1/1-354	48. B.taurus.XP_027389903.1/1-352	49. V.pacos.XP_006215955.1/1-350
1. H.sapiens.ATP1B1.NP_001668.1/1-303		91.7	92.1	91.7	92.4	92.1	93.7	93.4	93.4	29.5	31.3	31.3	31.0	31.4	31.3	29.8	29.7	29.7	29.8	29.7	38.7	38.0	38.0	38.0	38.3	33.9	38.0	30.8	38.0	38.0	35.5	35.4	35.1	31.4	34.8	27.9	35.5	28.0	33.1	34.9	27.8	28.3	27.4	27.4	28.0	27.3	27.1	27.9	28.2
2. B.taurus.4XE5_B/1-303	97.0		99.7	100.0	99.3	99.0	93.4	93.1	93.4	27.9	29.5	29.5	29.2	29.6	29.5	28.5	28.1	28.4	28.3	27.9	40.1	39.5	39.5	39.5	39.8	35.3	39.5	33.0	40.1	40.1	35.8	35.8	35.5	31.8	34.9	28.3	35.4	27.7	32.9	35.0	27.6	28.1	26.6	26.6	27.2	26.6	26.4	27.2	27.5
3. B.bubalis.XP_006054394.1/1-303	97.0	100.0		99.7	99.7	99.3	93.7	93.4	93.7	27.9	29.5	29.5	29.2	29.6	29.5	28.5	28.1	28.4	28.3	27.9	39.8	39.2	39.2	39.2	39.5	35.0	39.2	32.7	39.8	39.8	35.5	36.2	35.8	32.2	35.2	28.7	35.0	27.4	32.6	35.3	27.6	28.1	26.6	26.6	27.2	26.6	26.4	27.2	27.5
4. B.mutus.XP_005902436.1/1-303	97.0	100.0	100.0		99.3	99.0	93.4	93.1	93.4	27.9	29.5	29.5	29.2	29.6	29.5	28.5	28.1	28.4	28.3	27.9	40.1	39.5	39.5	39.5	39.8	35.3	39.5	33.0	40.1	40.1	35.8	35.8	35.5	31.8	34.9	28.3	35.4	27.7	32.9	35.0	27.6	28.1	26.6	26.6	27.2	26.6	26.4	27.2	27.5
5. O.aries.NP_001009796.1/1-303	97.0	100.0	100.0	100.0		99.7	93.4	93.1	93.4	28.2	29.8	29.8	29.5	29.9	29.8	28.8	28.4	28.8	28.6	28.2	39.8	39.2	39.2	39.2	39.5	35.0	39.2	32.7	39.8	39.8	35.5	36.5	36.2	32.5	35.5	29.0	35.0	27.4	32.6	35.6	27.6	28.1	26.6	26.6	27.2	26.6	26.4	27.2	27.5
6. C.hircus.XP_005690673.1/1-303	97.0	100.0	100.0	100.0	100.0		93.1	92.7	93.1	28.2	29.8	29.8	29.5	29.9	29.8	28.8	28.4	28.8	28.6	28.2	39.8	39.2	39.2	39.2	39.5	35.0	39.2	32.7	39.8	39.8	35.5	36.5	36.2	32.5	35.5	29.0	35.0	27.4	32.6	35.6	27.6	28.1	26.6	26.6	27.2	26.6	26.4	27.2	27.5
7. C.ferus.XP_006173308.1/1-303	98.0	98.3	98.3	98.3	98.3	98.3		99.7	99.3	29.8	31.4	31.4	31.1	31.5	31.3	29.8	29.8	29.8	30.1	29.8	39.3	38.7	38.7	38.7	39.0	34.5	38.7	31.8	39.0	39.0	34.4	34.9	34.6	30.9	34.6	27.3	34.1	26.5	31.6	34.7	28.1	28.6	27.4	27.4	27.8	27.4	27.2	28.0	28.0
8. C.bactrianus.XP_010952134.1/1-303	97.7	98.0	98.0	98.0	98.0	98.0	99.7		99.0	29.8	31.4	31.4	31.1	31.5	31.3	29.8	29.8	29.8	30.1	29.8	39.3	38.7	38.7	38.7	39.0	34.5	38.7	31.8	39.0	39.0	34.4	34.9	34.6	30.9	34.6	27.3	34.1	26.5	31.6	34.7	27.8	28.3	26.6	26.6	27.8	27.4	26.4	27.2	28.0
9. V.pacos.XP_006211156.1/1-303	98.0	98.0	98.0	98.0	98.0	98.0	99.7	99.3		29.5	31.1	31.1	30.8	31.2	31.0	29.5	29.5	29.5	29.8	29.5	39.3	38.7	38.7	38.7	39.0	34.5	38.7	31.8	39.0	39.0	34.4	35.2	34.9	31.2	34.3	27.7	34.1	26.5	31.6	34.4	28.5	29.1	27.9	27.9	28.2	27.8	27.6	28.4	28.5
10. H.sapiens.ATP4B.NP_000696.1/1-291	53.1	53.1	53.1	53.1	53.1	52.8	53.1	53.1	53.1		83.8	84.9	84.2	83.2	83.8	84.9	85.6	85.6	85.6	86.0	39.1	38.4	38.4	38.0	38.7	33.3	38.7	30.4	38.2	38.7	34.7	33.2	33.2	29.5	33.9	27.5	32.7	25.9	28.9	33.6	28.3	28.3	28.2	28.5	28.3	28.1	26.8	27.6	28.3
11. B.taurus.NP_001193069.1/1-290	51.8	51.8	51.8	51.8	51.8	51.8	53.1	53.1	53.1	91.8		99.0	99.3	99.0	99.3	96.9	88.7	88.4	88.6	89.0	42.2	41.5	41.5	41.2	41.8	35.9	41.8	33.7	41.8	41.8	35.5	35.2	35.2	31.1	35.8	29.4	34.1	27.3	30.0	36.2	28.9	29.7	29.6	29.3	29.1	29.5	28.5	29.2	29.1
12. B.bubalis.XP_006076675.1/1-290	51.8	51.8	51.8	51.8	51.8	51.8	53.1	53.1	53.1	92.1	99.7		99.0	97.9	99.0	96.6	89.0	88.7	89.0	89.4	42.2	41.5	41.5	41.2	41.8	35.9	41.8	33.7	41.8	41.8	35.8	35.2	35.2	31.1	35.8	29.4	34.1	27.3	30.5	36.2	29.2	29.4	29.0	29.3	28.8	28.9	27.9	28.7	28.8
13. B.indicus.XP_019827352.1/1-290	51.5	51.5	51.5	51.5	51.5	51.5	52.8	52.8	52.8	91.8	99.7	99.3		98.3	99.3	96.9	88.7	88.4	88.6	89.0	42.2	41.5	41.5	41.2	41.8	35.9	41.8	33.7	41.8	41.8	35.5	35.2	35.2	31.1	35.8	29.4	34.1	27.3	30.5	36.2	29.4	29.7	29.3	29.6	29.1	29.2	28.2	28.9	29.1
14. B.mutus.XP_005910586.1/1-290	52.1	52.1	52.1	52.1	52.1	52.1	53.5	53.5	53.5	91.4	99.3	99.0	99.0		98.3	95.9	88.0	87.7	87.9	88.4	41.8	41.2	41.2	40.8	41.5	35.9	41.5	33.3	41.5	41.5	35.5	35.2	35.2	31.1	35.8	29.4	34.1	27.3	30.0	36.2	28.6	29.7	29.3	28.5	28.3	29.2	28.2	28.9	28.3
15. B.bison.XP_010829740.1/1-290	52.1	51.8	51.8	51.8	51.8	51.8	53.8	53.8	53.8	91.8	100.0	99.7	99.7	99.3		96.9	88.7	88.4	88.6	89.0	42.2	41.5	41.5	41.2	41.8	35.9	41.8	33.7	41.8	41.8	35.5	34.5	34.5	30.4	35.2	28.7	34.1	27.3	30.5	36.2	29.4	29.7	29.3	29.6	29.1	29.2	28.2	28.9	29.1
16. C.hircus.XP_017900480.1/1-290	50.5	51.8	51.8	51.8	51.8	51.8	52.5	52.5	52.5	92.4	98.6	98.3	98.3	97.9	98.6		88.3	88.3	88.3	88.3	42.2	41.5	41.5	41.2	41.8	35.9	41.8	33.7	41.8	41.8	34.8	33.8	33.8	29.7	34.8	28.0	33.4	26.6	29.8	34.8	29.5	29.8	29.4	29.6	29.2	29.3	28.3	29.1	29.2
17. C.ferus.XP_006176796.1/1-291	51.5	51.8	51.8	51.8	51.8	51.8	52.8	52.8	52.8	92.8	95.5	95.2	95.2	95.2	95.5	94.8		99.7	99.3	99.0	38.8	38.1	38.8	37.8	38.4	32.4	38.4	30.6	38.4	38.4	34.7	34.4	34.4	30.3	35.0	28.2	33.3	26.2	29.7	34.7	28.9	28.3	28.5	28.7	28.5	28.4	27.4	28.1	28.5
18. C.bactrianus.XP_010950625.1/1-291	51.5	52.1	52.1	52.1	52.1	52.1	53.1	53.1	53.1	92.8	95.2	94.8	94.8	94.8	95.2	94.8	99.7		99.0	98.6	38.8	38.1	38.8	37.8	38.4	32.4	38.4	30.6	38.4	38.4	34.7	34.4	34.4	30.3	35.0	28.2	34.0	26.9	30.4	34.7	29.2	28.6	28.7	29.0	28.8	28.7	27.7	28.4	28.8
19. C.dromedarius.XP_031321504.1/1-289	51.2	52.5	52.5	52.5	52.5	52.5	53.1	53.1	53.1	92.4	94.8	94.5	94.5	94.5	94.8	94.8	99.3	99.0		98.6	39.2	38.6	39.2	38.2	38.9	32.8	38.9	31.1	38.9	38.9	34.6	34.6	34.6	30.5	35.3	28.4	33.6	26.4	29.9	34.9	29.1	28.5	28.6	28.9	28.7	28.5	27.5	28.3	28.7
20. O.aries.ATP1B2.XP_004012719.1/1-290	51.5	52.5	52.5	52.5	52.5	52.5	52.8	52.8	52.8	93.1	95.2	94.8	94.8	94.8	95.2	94.8	99.7	99.3	99.0		38.8	38.1	38.8	37.8	38.4	32.4	38.4	30.8	38.6	38.4	34.4	34.4	34.4	30.3	35.0	28.2	33.3	26.2	29.7	34.7	29.2	28.6	28.7	29.0	28.8	28.7	27.7	28.4	28.8
21. H.sapiens.ATP1B2.NP_001669.3/1-290	58.1	58.1	58.1	58.1	58.1	58.1	58.1	58.1	58.1	61.9	60.7	60.7	60.7	60.3	61.0	60.7	60.1	60.5	59.7	59.8		97.9	98.6	96.9	99.0	82.9	98.6	80.3	98.6	98.6	46.8	45.9	45.9	40.2	45.6	35.5	47.5	35.6	42.4	45.3	33.4	34.0	33.3	33.3	33.4	33.2	31.8	32.8	33.7
22. B.taurus.NP_777102.1/1-290	57.8	57.8	57.8	57.8	57.8	57.8	57.8	57.8	57.8	61.5	60.3	60.3	60.3	60.0	60.7	60.3	59.8	60.1	59.3	59.5	99.0		98.6	96.9	99.0	82.9	98.6	80.0	98.3	98.6	47.1	45.9	45.9	40.2	45.6	35.5	47.5	35.6	42.4	45.3	33.1	33.7	33.1	33.1	33.1	33.0	31.5	32.5	33.4
23. B.bubalis.NP_001277856.1/1-290	58.1	58.1	58.1	58.1	58.1	58.1	58.1	58.1	58.1	61.9	60.7	60.7	60.7	60.3	61.0	60.7	60.1	60.5	59.7	59.8	99.3	99.7		97.6	99.7	83.5	99.3	80.7	99.0	99.3	47.1	45.9	45.9	40.2	45.6	35.5	47.5	35.6	42.4	45.3	33.4	34.0	33.3	33.3	33.4	33.2	31.8	32.8	33.7
24. B.mutus.XP_005894863.1/1-290	57.1	57.1	57.1	57.1	57.1	57.1	57.1	57.1	57.1	60.8	59.7	59.7	59.7	59.3	60.0	59.7	59.1	59.5	58.6	58.8	97.6	97.9	98.3		97.9	81.9	97.6	79.0	97.2	97.6	45.8	44.6	44.6	38.9	44.3	34.1	46.1	34.2	41.1	43.9	32.6	33.1	32.5	32.5	32.6	32.4	30.9	31.9	32.9
25. B.indicus.XP_019837998.1/1-290	58.1	58.1	58.1	58.1	58.1	58.1	58.1	58.1	58.1	61.9	60.7	60.7	60.7	60.3	61.0	60.7	60.1	60.5	59.7	59.8	99.3	99.7	100.0	98.3		83.9	99.7	81.0	99.3	99.7	47.5	46.3	46.3	40.5	45.9	35.8	47.8	35.9	42.8	45.6	33.4	34.0	33.3	33.3	33.4	33.2	31.8	32.8	33.7
26. B.bison.XP_010841514.1/1-310	54.2	54.2	54.2	54.2	54.2	54.2	54.2	54.8	54.2	55.2	53.5	53.9	53.9	52.9	54.2	53.9	54.5	54.8	53.9	54.2	85.2	85.5	85.8	84.2	85.8		83.5	75.8	83.2	83.5	41.1	40.8	40.8	38.3	40.5	33.2	41.3	33.7	41.3	40.2	33.8	33.8	33.2	33.2	33.0	33.1	31.7	32.3	33.2
27. O.aries.XP_004012719.1/1-290	58.1	58.1	58.1	58.1	58.1	58.1	58.1	58.1	58.1	61.9	60.7	60.7	60.7	60.3	61.0	60.7	60.1	60.5	59.7	59.8	99.3	99.7	100.0	98.3	100.0	85.8		80.7	99.0	99.3	47.1	45.9	45.9	40.2	46.3	35.5	47.5	35.6	42.4	45.3	33.4	34.0	33.3	33.3	33.4	33.2	31.8	32.8	33.7
28. C.ferus.XP_014407115.1/1-237	47.5	47.5	47.5	47.5	47.5	47.5	47.9	47.9	47.9	49.1	48.3	48.3	48.3	48.3	48.3	48.3	48.1	48.5	47.8	48.1	81.0	81.4	81.7	80.0	81.7	76.5	81.7		81.7	81.4	36.9	36.6	36.6	41.3	36.3	43.6	37.1	43.8	38.4	35.9	28.2	27.9	28.7	28.7	28.5	28.6	27.1	27.2	28.7
29. C.bactrianus.XP_010964225.1/1-290	58.1	58.1	58.1	58.1	58.1	58.1	58.4	58.4	58.4	61.5	60.7	60.7	60.7	60.3	60.7	60.7	60.1	60.5	59.7	60.1	99.3	99.7	100.0	98.3	100.0	85.8	100.0	81.7		99.7	47.5	46.3	46.3	40.5	45.9	35.8	47.8	35.9	42.8	45.6	33.7	34.3	33.6	33.6	33.7	33.5	32.0	33.1	34.0
30. V.pacos.XP_006218838.1/1-290	58.1	58.1	58.1	58.1	58.1	58.1	58.4	58.4	58.4	61.9	60.7	60.7	60.7	60.3	60.7	60.7	60.1	60.5	59.7	59.8	99.3	99.7	100.0	98.3	100.0	85.8	100.0	81.7	100.0		47.8	46.3	46.3	40.5	45.9	35.8	47.8	35.9	42.8	45.6	33.7	34.3	33.6	33.6	33.7	33.5	32.0	33.1	34.0
31. H.sapiens.ATP1B3.NP_001670.1/1-279	55.4	54.5	54.5	54.5	54.8	54.8	54.8	54.5	54.8	54.6	57.2	57.6	57.2	56.6	57.2	56.2	55.3	55.7	55.7	55.0	66.9	67.2	67.6	65.9	67.6	59.4	67.6	56.3	67.9	67.9		77.4	77.1	66.3	77.4	58.8	83.9	64.2	73.7	78.5	30.5	30.7	30.1	30.1	31.3	30.0	29.0	29.5	31.3
32. B.taurus.NP_001030470.1/1-279	57.8	57.4	57.4	57.4	57.4	57.4	57.1	56.8	57.1	56.4	58.6	58.6	58.6	57.9	57.9	57.9	57.7	57.4	58.1	57.7	65.9	65.9	66.2	64.5	66.2	59.4	66.2	55.2	66.2	66.2	86.0		99.6	86.7	98.6	78.9	82.8	63.4	72.6	96.8	30.8	31.3	30.7	30.7	30.3	30.6	29.6	30.1	30.3
33. B.indicus.XP_019817093.1/1-279	57.4	57.1	57.1	57.1	57.1	57.1	56.8	56.4	56.8	56.4	58.6	58.6	58.6	57.9	57.9	57.9	57.7	57.4	58.1	57.7	65.5	65.5	65.9	64.1	65.9	59.0	65.9	54.8	65.9	65.9	85.7	99.6		86.4	98.6	78.5	82.4	63.1	72.2	96.4	30.8	31.3	30.7	30.7	30.3	30.6	29.6	30.1	30.3
34. B.mutus.ELR61450.1/1-243	52.1	51.8	51.8	51.8	51.8	51.8	51.5	51.5	51.5	49.8	52.1	52.1	52.1	51.7	51.4	51.4	50.9	50.5	51.2	50.9	57.9	57.9	58.3	56.6	58.3	54.5	58.3	63.8	58.3	58.3	73.8	87.1	86.7		86.0	90.9	70.6	72.4	73.2	84.2	27.5	26.9	27.1	27.1	27.2	27.0	26.0	25.7	27.2
35. B.bubalis.XP_006078090.1/1-279	56.8	56.8	56.8	56.8	56.8	56.8	56.4	56.1	56.4	56.4	58.6	58.6	58.6	57.9	57.9	57.9	57.7	57.4	58.1	57.7	66.2	66.6	66.9	65.2	66.9	60.0	66.9	55.9	66.9	66.9	86.0	99.6	99.3	86.7		78.1	82.4	63.1	72.2	97.5	30.8	31.3	30.7	30.7	30.3	30.6	29.6	30.1	30.3
36. B.bison.XP_010856473.1/1-222	47.2	46.9	46.9	46.9	46.9	46.9	46.5	46.5	46.5	45.0	47.2	47.2	47.2	46.9	46.6	46.6	46.0	45.7	46.4	46.0	51.7	51.7	52.1	50.3	52.1	48.4	52.1	63.7	52.1	52.1	66.3	79.2	78.9	90.9	78.9		63.1	79.3	65.4	76.7	25.3	25.0	25.1	25.1	24.9	25.1	24.1	24.0	24.9
37. C.dromedarius.XP_031302045.1/1-279	56.1	54.5	54.5	54.5	54.8	54.8	54.8	54.5	54.8	55.0	55.9	55.9	55.9	55.2	55.9	55.9	55.0	55.3	55.4	55.0	64.8	65.2	65.5	63.8	65.5	57.7	65.5	53.8	65.5	65.5	90.0	87.5	87.1	75.3	87.5	67.7		79.6	88.6	82.4	29.6	29.9	29.0	29.0	29.9	28.6	28.1	28.4	29.9
38. C.bactrianus.XP_010950563.1/1-222	45.5	43.9	43.9	43.9	44.2	44.2	44.2	44.2	44.2	43.0	43.8	43.8	43.8	43.4	43.8	43.8	42.6	43.0	42.9	42.6	49.3	49.7	50.0	48.3	50.0	46.8	50.0	61.2	50.0	50.0	69.9	67.7	67.4	77.8	67.7	85.1	79.6		82.5	63.1	23.5	23.3	23.7	23.7	23.4	23.6	22.8	22.6	23.4
39. V.pacos.XP_006202823.2/1-269	53.5	51.8	51.8	51.8	52.1	52.1	52.1	51.8	52.1	50.5	51.4	51.0	51.0	51.0	51.0	51.0	49.8	50.2	50.2	49.8	59.0	59.3	59.7	57.9	59.7	56.5	59.7	55.8	59.7	59.7	81.7	78.9	78.5	78.1	78.9	70.3	90.7	82.5		72.2	28.3	28.0	28.1	28.1	28.2	28.0	27.2	26.9	28.2
40. O.aries.XP_011957641.1/1-279	56.1	56.1	56.1	56.1	56.1	56.1	55.8	55.4	55.8	56.0	58.3	58.3	58.3	57.6	58.3	57.6	57.4	57.0	57.8	57.4	66.2	66.6	66.9	65.2	66.9	60.0	66.9	55.9	66.9	66.9	86.7	98.2	97.8	85.3	98.6	77.8	87.8	68.1	79.2		30.3	30.8	30.4	30.4	30.0	30.4	29.4	29.8	30.0
41. H.sapiens.ATP1B4.NP_036201.1/1-353	48.7	48.2	48.2	48.2	48.2	48.2	48.7	48.4	49.3	46.2	46.2	47.6	47.6	46.2	47.3	47.3	47.9	47.9	47.6	47.9	51.3	51.3	51.6	51.0	51.6	52.1	51.6	42.8	51.6	51.6	49.6	51.6	51.3	45.3	51.6	41.1	51.0	39.9	47.9	52.1		98.9	91.5	91.8	91.8	90.9	87.9	87.7	92.1
42. H.sapiens.NP_001135919.1/1-357	48.7	48.2	48.2	48.2	48.2	48.2	48.7	48.5	49.3	45.4	46.8	46.8	46.8	46.8	46.5	46.5	46.8	46.8	46.5	46.8	51.8	51.8	52.1	51.5	52.1	51.8	52.1	42.3	52.1	52.1	49.6	51.5	51.3	44.5	51.5	40.6	51.0	39.5	47.3	52.1	98.9		90.5	90.8	90.8	89.9	86.9	88.8	91.0
43. B.taurus.XP_005227518.1/1-351	49.9	48.7	48.7	48.7	48.7	48.7	48.7	48.1	49.3	46.2	48.1	47.3	47.3	48.1	47.0	46.7	47.3	47.3	47.0	47.3	52.1	52.1	52.4	51.9	52.4	52.4	52.4	43.0	52.4	52.4	49.9	51.3	51.0	45.6	51.3	41.3	49.9	39.9	48.4	51.6	95.8	94.7		99.7	96.0	99.1	96.3	96.1	96.3
44. B.bubalis.XP_006048859.1/1-351	49.9	48.7	48.7	48.7	48.7	48.7	48.7	48.1	49.3	47.0	47.3	48.1	48.1	47.3	47.9	47.6	47.9	47.9	47.6	47.9	52.1	52.1	52.4	51.9	52.4	52.4	52.4	43.0	52.4	52.4	49.9	51.3	51.0	45.6	51.3	41.3	49.9	39.9	48.4	51.6	95.8	94.7	100.0		96.3	98.9	96.0	95.8	96.6
45. C.ferus.XP_006194169.1/1-350	49.4	48.3	48.3	48.3	48.3	48.3	48.9	49.1	49.4	46.6	47.7	47.7	47.7	47.4	47.4	47.1	47.4	47.4	47.1	47.4	52.3	52.3	52.6	52.0	52.6	52.6	52.6	43.1	52.6	52.6	48.3	51.4	51.1	45.4	51.4	41.4	49.4	40.0	47.7	51.7	96.3	95.2	98.6	98.6		95.5	92.4	92.1	99.7
46. O.aries.XP_011962738.1/1-352	49.7	48.6	48.6	48.6	48.6	48.6	48.6	48.9	49.1	46.6	47.7	47.7	47.7	47.7	47.4	47.2	47.4	47.4	47.2	47.4	52.0	52.0	52.3	51.7	52.3	52.0	52.3	42.9	52.3	52.3	49.7	51.1	50.9	45.5	51.1	41.2	50.3	39.8	48.3	51.4	95.5	94.4	99.1	99.1	98.0		95.5	95.2	95.7
47. C.hircus.XP_017899763.1/1-354	48.6	47.5	47.5	47.5	47.5	47.5	47.5	46.9	48.0	44.6	46.6	45.8	45.8	46.6	45.5	45.2	45.8	45.8	45.5	45.8	50.0	50.3	50.3	49.7	50.3	50.3	50.3	41.0	50.3	50.3	48.0	50.0	49.7	44.4	50.0	40.1	49.2	39.3	47.7	50.3	92.7	91.9	96.3	96.3	94.9	95.8		95.3	92.7
48. B.taurus.XP_027389903.1/1-352	49.7	48.6	48.6	48.6	48.6	48.6	48.6	48.0	49.1	45.7	47.7	46.9	46.9	47.7	46.6	46.3	46.9	46.9	46.6	46.9	51.7	51.7	52.0	51.4	52.0	50.9	52.0	41.8	52.0	52.0	49.4	50.3	50.0	44.0	50.3	40.1	49.7	39.2	47.7	50.6	93.5	93.6	97.4	97.4	96.0	96.9	97.2		92.4
49. V.pacos.XP_006215955.1/1-350	49.4	48.3	48.3	48.3	48.3	48.3	48.9	49.1	49.4	46.6	47.7	47.7	47.7	47.4	47.4	47.1	47.4	47.4	47.1	47.4	52.3	52.3	52.6	52.0	52.6	52.6	52.6	43.1	52.6	52.6	48.6	51.7	51.4	45.7	51.7	41.4	49.7	40.0	48.0	52.0	96.3	95.2	98.6	98.6	100.0	98.0	94.9	96.0
