# Supplementary material for: The Non-Gastric H+/K+ ATPase (ATP12A) Is Expressed in Mammalian Spermatozoa
Source: Int J Mol Sci. 2022 Jan 19;23(3):1048. doi: 10.3390/ijms23031048 (PMC8835340; doi:10.3390/ijms23031048)
Supplement: Supplementary file 1 [file ijms-23-01048-s001.zip › Supplementary Table S3.xlsx]

## Sheet: Foglio1
	Group1	BtATP1A1 (4xe5.chainA)	SsATP4A (5ylu.chainA)	BtATP12A	BtATP12A
	Group2	BtATP1B1 (4xe5.chainB)	SsATP4B (5ylu.chainB)	BtATP1B1(4xe5.chainB)	BtATP4B
	IntraclashesGroup1	78.0266	66.5328	80.0072	77.1368
	IntraclashesGroup2	15.5783	17.9044	17.5102	18.5363
	Interaction Energy (Kcal/mol)	-31.219	-29.8895	-27.5605	-23.1698
	Backbone Hbond	-5.31704	-6.28601	-3.39804	-4.03601
	Sidechain Hbond	-11.6701	-9.12994	-7.14147	-8.91666
	Van der Waals	-38.1938	-37.1111	-35.8844	-40.6221
	Electrostatics	-4.25734	-3.8919	-4.49383	-2.16229
	Solvation Polar	47.4824	45.7034	43.6902	50.3741
	Solvation Hydrophobic	-52.2947	-49.2828	-50.1628	-54.8596
	Van der Waals clashes	2.25053	4.29396	3.04206	2.63578
	entropy sidechain	24.7622	20.0409	22.0685	26.4909
	entropy mainchain	7.52937	7.03753	6.78729	8.98588
	torsional clash	0.401972	0.146479	0.527091	0.406856
	backbone clash	8.43739	7.31624	6.71713	6.98706
	helix dipole	-0.301433	-0.260758	-0.707615	-0.597209
	electrostatic kon	-1.8439	-1.18476	-1.9316	-0.959202
	energy Ionisation	0	0.0354736	0.0441567	0.0897243
	Entropy Complex	2.384	2.384	2.384	2.384
	Number of Residues	1311	1235	1318	1294
	Interface Residues	96	90	97	98
